# Supplementary material
Source: Springer Nature journal article supplement (https://www.springermedizin.de/resource/supplementary/12890_2009_669_MOESM2_ESM.pdf/9506144)
Supplement: MOESM2 [file 9506144]

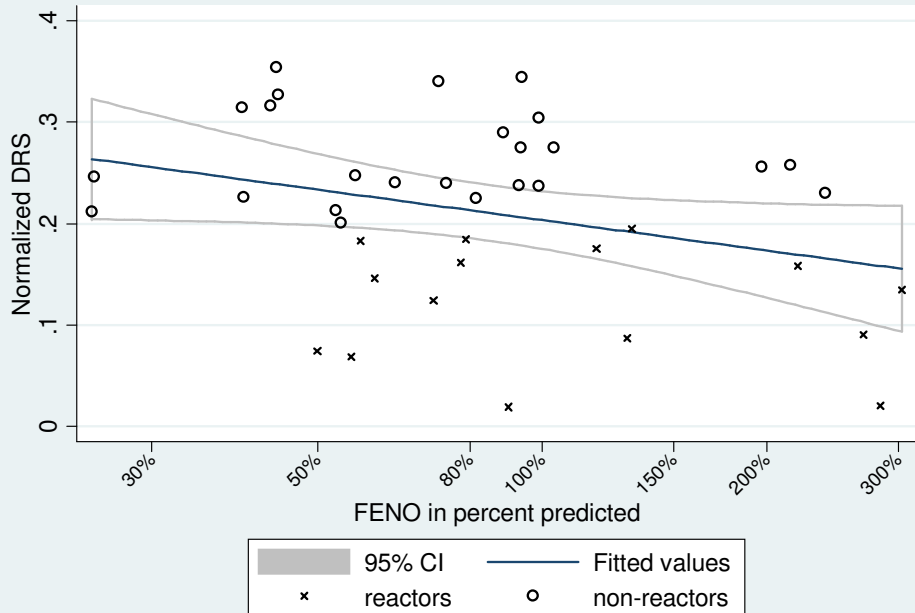

DRS: Dose-response slope in the Methacholine Bronchial Challenge test

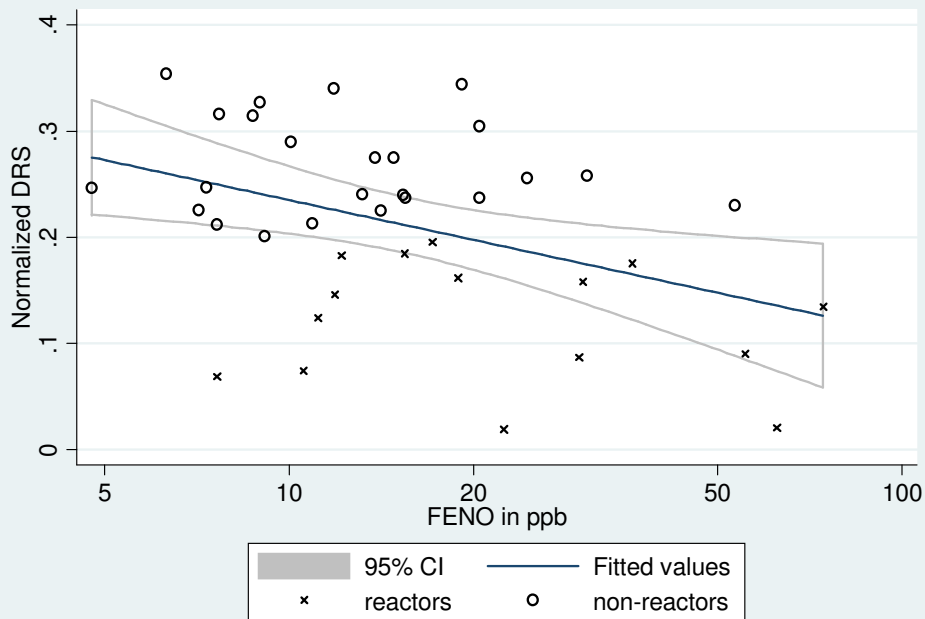

DRS: Dose-response slope in the Methacholine Bronchial Challenge test
